# Supplementary material for: Novel Sm3+-doped La3Ga5MO14 (M = Si or Ge) phosphors for indoor illumination: effects of M cations on photoluminescence
Source: Royal Society of Chemistry journal article supplement (doi:10.1039/d3dt03386d), 2024-01-01
Supplement: d3dt03386d1.pdf [file d3dt03386d1.pdf]

Supplementary materials for

**Novel Sm<sup>3+</sup> doped La<sub>3</sub>Ga<sub>5</sub>MO<sub>14</sub> (M = Si, Ge) phosphors for indoor illumination:  
effects of M cations on photoluminescence**

Xiaohua Li<sup>a</sup>, Jina Ding<sup>b,\*</sup>, Zhuo Tang<sup>a</sup>, Xinyi Lin<sup>a</sup>, Huan Dong<sup>a</sup>, Anhua Wu<sup>c</sup>, Linwen Jiang<sup>a,\*</sup>

<sup>a</sup>School of Materials Science and Chemical Engineering, State Key Laboratory Base of Novel Functional Materials and Preparation Science, Ningbo University, Ningbo 315211, P. R. China

<sup>b</sup>State Key Laboratory for Managing Biotic and Chemical Threats to the Quality and Safety of Agro-products, Institute of Plant Virology, Ningbo University, Ningbo 315211, P. R. China

<sup>c</sup>Shanghai Institute of Ceramics, Chinese Academy of Sciences, Shanghai 201800, P. R. China

Tab. S1. The lattice parameters of La<sub>3</sub>Ga<sub>5</sub>SiO<sub>14</sub>: xSm<sup>3+</sup>.

| (La <sub>1-x</sub> Sm <sub>x</sub> ) <sub>3</sub> Ga <sub>5</sub> SiO <sub>14</sub> | a = b (Å) | c (Å)   | V(Å <sup>3</sup> ) | α, β, γ               | Density |
|-------------------------------------------------------------------------------------|-----------|---------|--------------------|-----------------------|---------|
| 0                                                                                   | 8.14892   | 5.08145 | 292.23             | α = β = 90°, γ = 120° | 5.7808  |
| 0.01                                                                                | 8.13774   | 5.09491 | 292.2              | α = β = 90°, γ = 120° | 5.7814  |
| 0.02                                                                                | 8.13964   | 5.09221 | 292.18             | α = β = 90°, γ = 120° | 5.7818  |
| 0.03                                                                                | 8.14774   | 5.0777  | 291.93             | α = β = 90°, γ = 120° | 5.7867  |
| 0.04                                                                                | 8.14645   | 5.07878 | 291.9              | α = β = 90°, γ = 120° | 5.7873  |
| 0.05                                                                                | 8.13834   | 5.07107 | 290.87             | α = β = 90°, γ = 120° | 5.8077  |
| 0.06                                                                                | 8.13453   | 5.06643 | 290.87             | α = β = 90°, γ = 120° | 5.8185  |
| 0.07                                                                                | 8.1183    | 5.06241 | 288.95             | α = β = 90°, γ = 120° | 5.8464  |

Tab. S2. The lattice parameters of La<sub>3</sub>Ga<sub>5</sub>GeO<sub>14</sub>: xSm<sup>3+</sup>.

| (La <sub>1-x</sub> Sm <sub>x</sub> ) <sub>3</sub> Ga <sub>5</sub> GeO <sub>14</sub> | a = b (Å) | c (Å)   | V(Å <sup>3</sup> ) | α, β, γ               | Density |
|-------------------------------------------------------------------------------------|-----------|---------|--------------------|-----------------------|---------|
| 0                                                                                   | 8.23262   | 5.09216 | 298.89             | α = β = 90°, γ = 120° | 5.8992  |
| 0.01                                                                                | 8.22489   | 5.09295 | 298.37             | α = β = 90°, γ = 120° | 5.9094  |
| 0.02                                                                                | 8.23159   | 5.07937 | 298.06             | α = β = 90°, γ = 120° | 5.9155  |
| 0.03                                                                                | 8.21166   | 5.09982 | 297.82             | α = β = 90°, γ = 120° | 5.9204  |
| 0.04                                                                                | 8.21567   | 5.09447 | 297.79             | α = β = 90°, γ = 120° | 5.9209  |
| 0.05                                                                                | 8.20588   | 5.10023 | 297.42             | α = β = 90°, γ = 120° | 5.9283  |
| 0.06                                                                                | 8.20426   | 5.09979 | 297.28             | α = β = 90°, γ = 120° | 5.9311  |
| 0.07                                                                                | 8.1962    | 5.09735 | 296.55             | α = β = 90°, γ = 120° | 5.9457  |

\*Corresponding author.

E-mail addresses: dingjina@nbu.edu.cn (Jina Ding), jianglinwen@nbu.edu.cn (Linwen Jiang).

Tab. S3. Comparisons of the quantum yield between this work and other Sm<sup>3+</sup>-doped phosphors under different excitation and emission.

| Activator                  | Compound                                                         | $\lambda_{ex}(nm)$ | $\lambda_{em}(nm)$ | QY     | Ref.      |
|----------------------------|------------------------------------------------------------------|--------------------|--------------------|--------|-----------|
| <b>0.09Sm<sup>3+</sup></b> | Ca <sub>2</sub> NaMg <sub>2</sub> V <sub>3</sub> O <sub>12</sub> | 365                | 497                | 18.9%  | 1         |
| <b>0.04Sm<sup>3+</sup></b> | Sr <sub>2-2x</sub> Na <sub>x</sub> P <sub>2</sub> O <sub>7</sub> | 402                | 599                | 19.8%  | 2         |
| <b>0.5Sm<sup>3+</sup></b>  | CaAlSi                                                           | 403                | 591                | 25.66% | 3         |
| <b>0.03Sm<sup>3+</sup></b> | BiOCl                                                            | 408                | 598                | 2.12%  | 4         |
| <b>0.03Sm<sup>3+</sup></b> | LGSi                                                             | 403                | 599                | 27.14% | This work |
| <b>0.02Sm<sup>3+</sup></b> | LGGe                                                             | 403                | 599                | 56.07% | This work |

**References :**

1. L. Yang, X. Mi, H. Zhang, X. Zhang, Z. Bai and J. Lin, *J. Alloys Compd.*, 2019, **787**, 815-822.
2. S. s. Liu, D. c. Zhu, L. x. Yang, C. Zhao and Y. Pu, *J. Mater. Sci-Mater. El.*, 2018, **29**, 18781-18790.
3. N. Suebsing, C. Bootjomchai, V. Promarak and R. Laopaiboon, *J. Non-Cryst. Solids*, 2019, **523**, 119598.
4. P. Halappa, H. M. Rajashekar, C. Shivakumara and Compounds, *J. Alloys Compd.*, 2019, **785**, 169-177.

Tab. S4. The CCT and chromaticity coordinates at different Sm<sup>3+</sup> doping concentrations of LGSi.

| NO.      | (La <sub>1-x</sub> Sm <sub>x</sub> ) <sub>3</sub> GaSiO <sub>14</sub> | CIE (x, y)       | CCT (K) |
|----------|-----------------------------------------------------------------------|------------------|---------|
| <b>1</b> | 0.01                                                                  | (0.5763, 0.4198) | 1813    |
| <b>2</b> | 0.02                                                                  | (0.5763, 0.4202) | 1814    |
| <b>3</b> | 0.03                                                                  | (0.5770, 0.4197) | 1811    |
| <b>4</b> | 0.04                                                                  | (0.5739, 0.4221) | 1829    |
| <b>5</b> | 0.05                                                                  | (0.5732, 0.4227) | 1834    |
| <b>6</b> | 0.06                                                                  | (0.5735, 0.4224) | 1832    |
| <b>7</b> | 0.07                                                                  | (0.5688, 0.4260) | 1864    |

Tab. S5. The CCT and chromaticity coordinates at different Sm<sup>3+</sup> doping concentrations of LGGe.

| NO. | (La <sub>1-x</sub> Sm <sub>x</sub> ) <sub>3</sub> GaGeO <sub>14</sub> | CIE (x, y)       | CCT (K) |
|-----|-----------------------------------------------------------------------|------------------|---------|
| 1   | 0.01                                                                  | (0.5824, 0.4153) | 1783    |
| 2   | 0.02                                                                  | (0.5827, 0.4153) | 1782    |
| 3   | 0.03                                                                  | (0.5810, 0.4166) | 1790    |
| 4   | 0.04                                                                  | (0.5801, 0.4174) | 1794    |
| 5   | 0.05                                                                  | (0.5763, 0.4205) | 1815    |
| 6   | 0.06                                                                  | (0.5712, 0.4245) | 1848    |
| 7   | 0.07                                                                  | (0.5693, 0.4261) | 1862    |

Tab. S6. CCT, CRI, color coordinates, lm and luminous efficiency of prepared white-LEDs as a function of current.

| Current | CCT    | CRI   | CIE <i>x</i> | CIE <i>y</i> | lm   | luminous efficiency |
|---------|--------|-------|--------------|--------------|------|---------------------|
| 20 mA   | 6108 K | 87.17 | 0.31         | 0.35         | 0.30 | 5.08                |
| 40 mA   | 6154 K | 86.46 | 0.32         | 0.36         | 0.72 | 5.95                |
| 60 mA   | 6286 K | 86.44 | 0.31         | 0.36         | 1.20 | 6.52                |
| 80 mA   | 6212 K | 87.40 | 0.31         | 0.35         | 1.61 | 6.49                |
| 100 mA  | 6206 K | 87.71 | 0.31         | 0.35         | 2.03 | 6.42                |

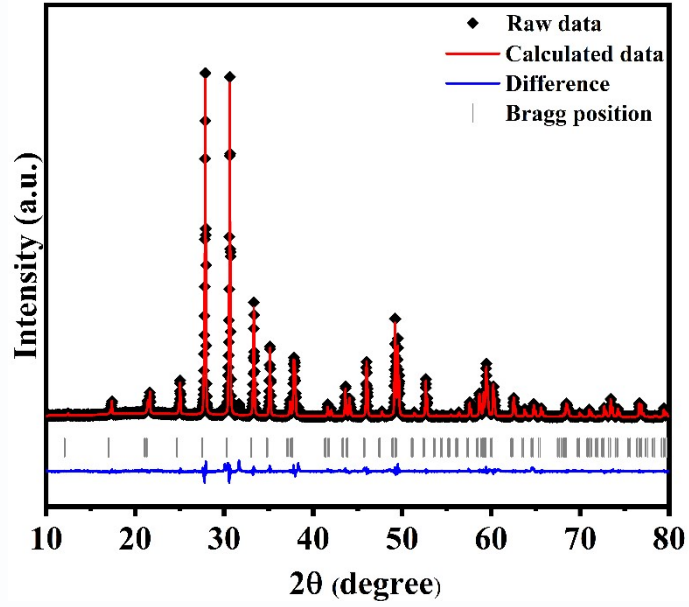

Fig. S1 XRD Rietveld refinement pattern of LGG: 0.02Sm<sup>3+</sup>.

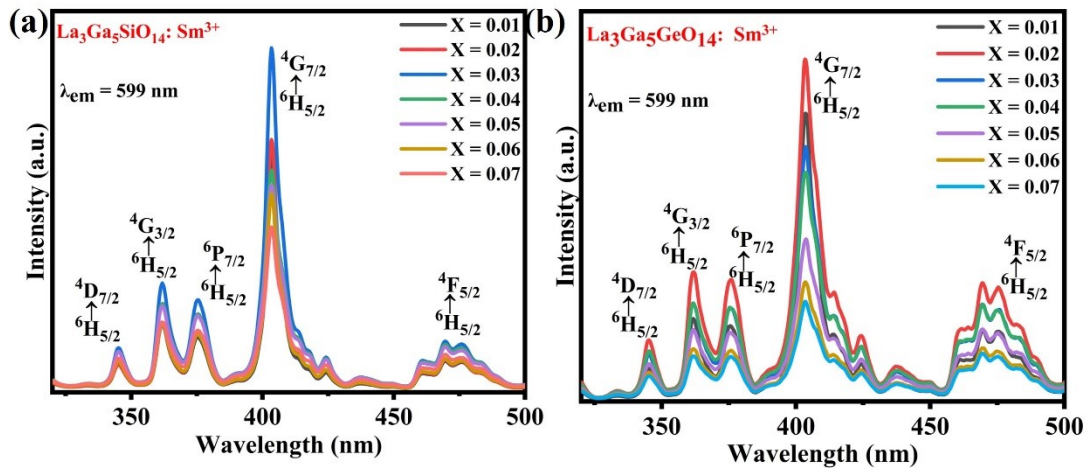

Fig. S2 The excitation spectra of (a) LGSi:  $x\text{Sm}^{3+}$  and (b) LGGe:  $x\text{Sm}^{3+}$ .

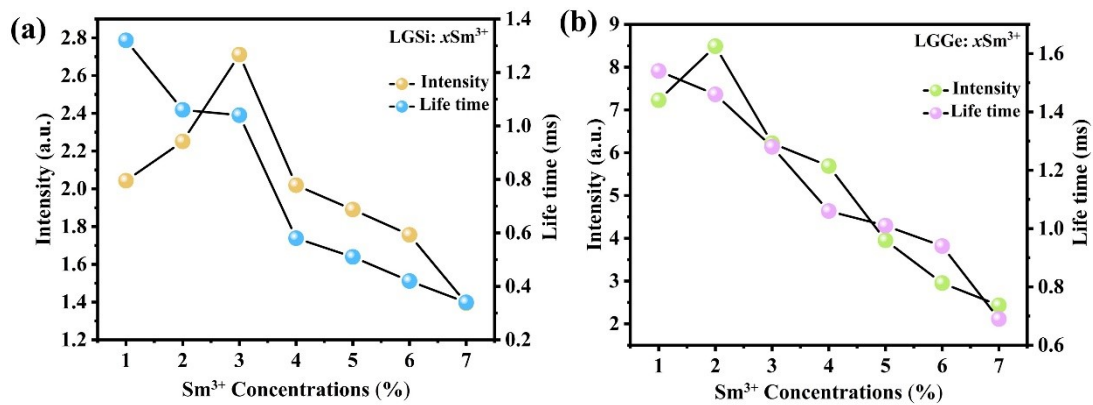

Fig. S3 The emission intensity (at 599 nm) and lifetimes in (a) LGSi: xSm<sup>3+</sup> and (b) LGGe: xSm<sup>3+</sup> at room temperature.

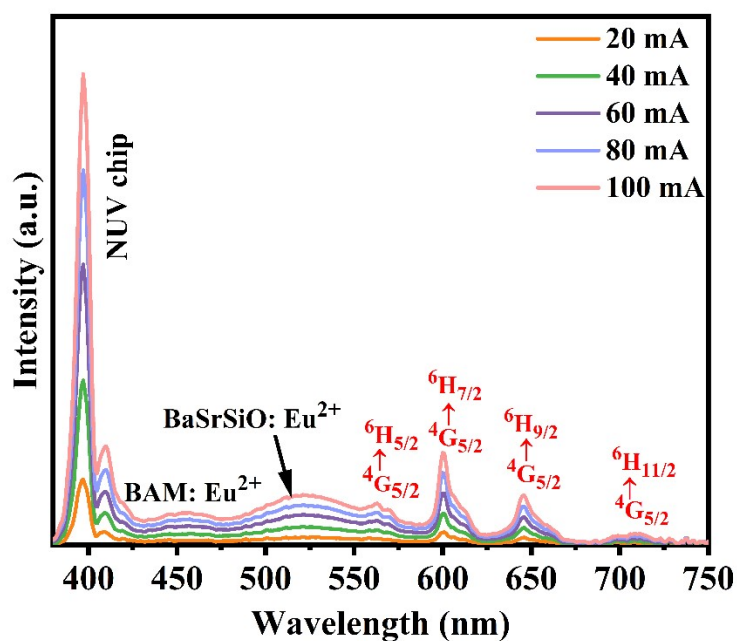

Fig. S4 The EL emission spectra of the developed w-LEDs under 20-100 mA injected current.
